# Supplementary material
Source: PubMed Central journal article supplement (PMC5411160)
Supplement: supp_pp.17.00298_PP2017-RA-00298DR1_Supplemental_Material.pdf [file supp_pp.17.00298_PP2017-RA-00298DR1_Supplemental_Material.pdf]

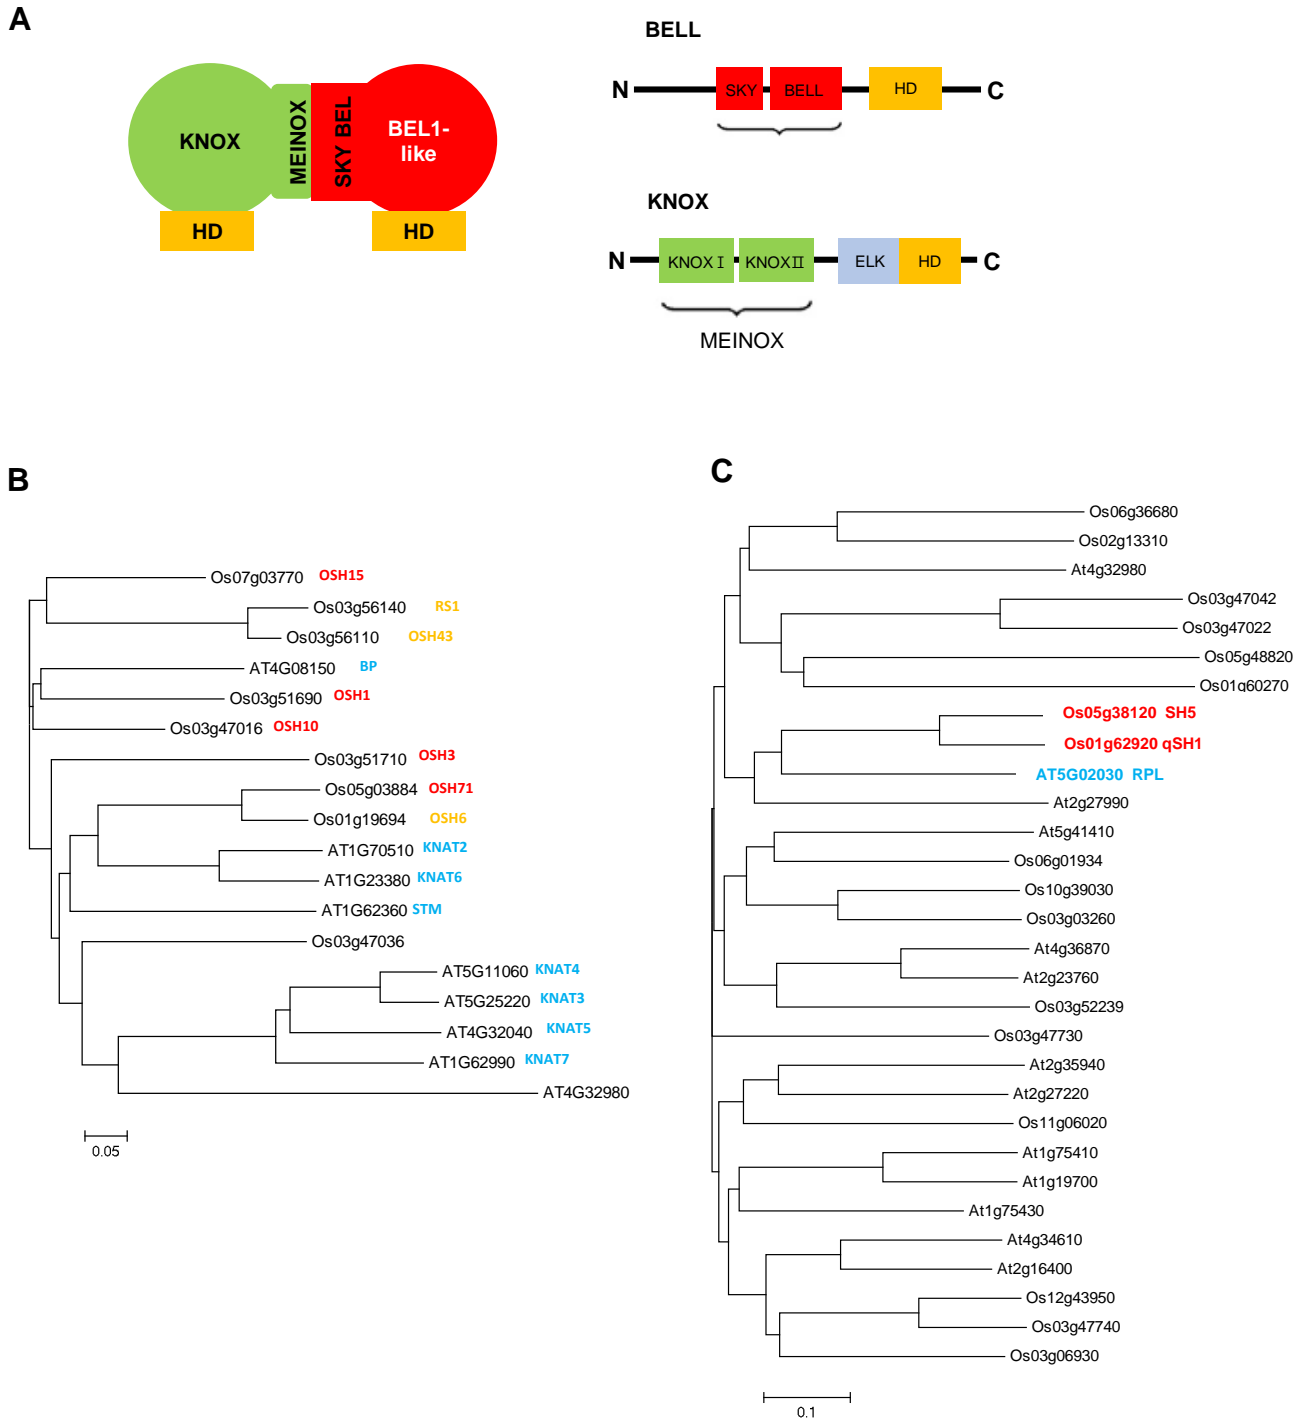

**Supplemental Figure 1.** Phylogenetic analysis and schematic diagram of **TALE-HD** members. A, Schematic diagrams of **TALE-HD** complex. B, Phylogenetic tree of KNOX protein from rice and Arabidopsis. C, Phylogenetic tree of BEL1-like homeobox (BLH) subfamily genes from rice and Arabidopsis. Phylogenetic analyses were conducted with ClustalX and MEGA5.1. Full-length amino acid residues were used. Tree was generated by Neighbor-joining method.

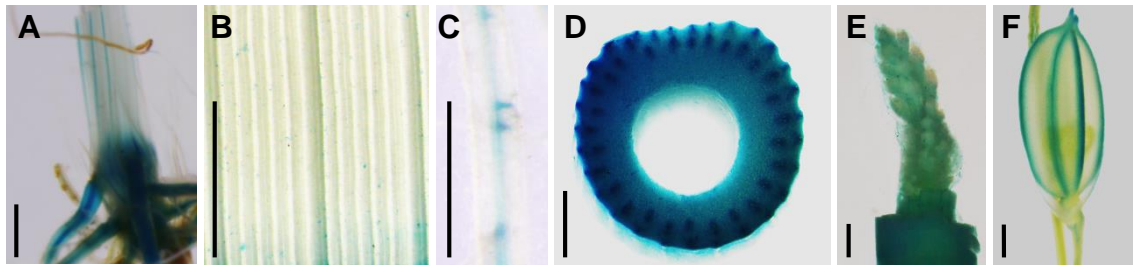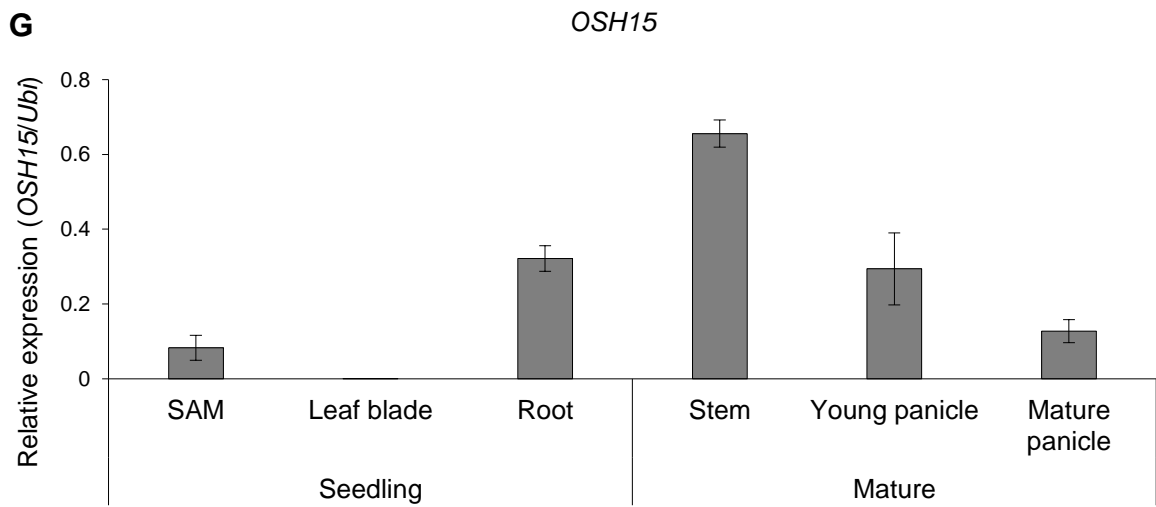

**Supplemental Figure 2.** Expression patterns of *OSH15*. A to C, GUS expression in SAM, leaf, and root at seedling stage. Bars = 2 mm. D to F, GUS expression in stem, young panicle, and mature spikelet. Bars = 5 mm. G, Endogenous expression of *OSH15* in various tissues. n = 4.

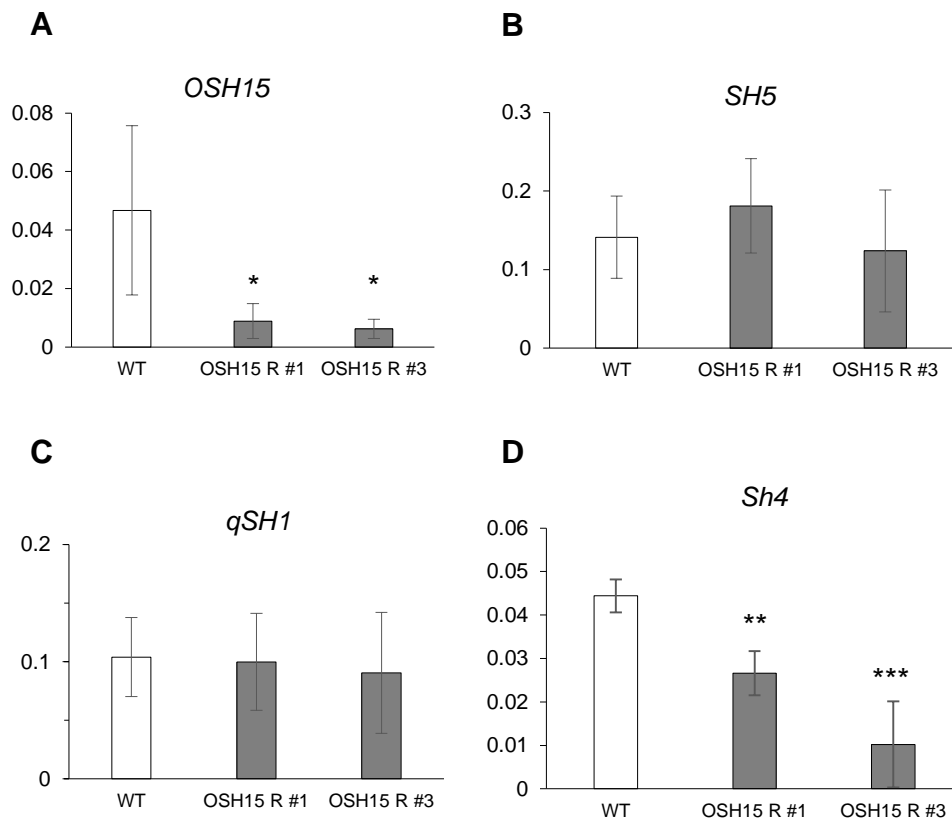

**Supplemental Figure 3.** Expression of shattering-related genes in young panicles (1-3 cm) from ‘Kasalath’ WT and *OSH15* RNAi Lines #1 and #3. (n = 4; \*,  $P < 0.05$ , \*\*,  $P < 0.01$ ; \*\*\*,  $P < 0.001$ ).

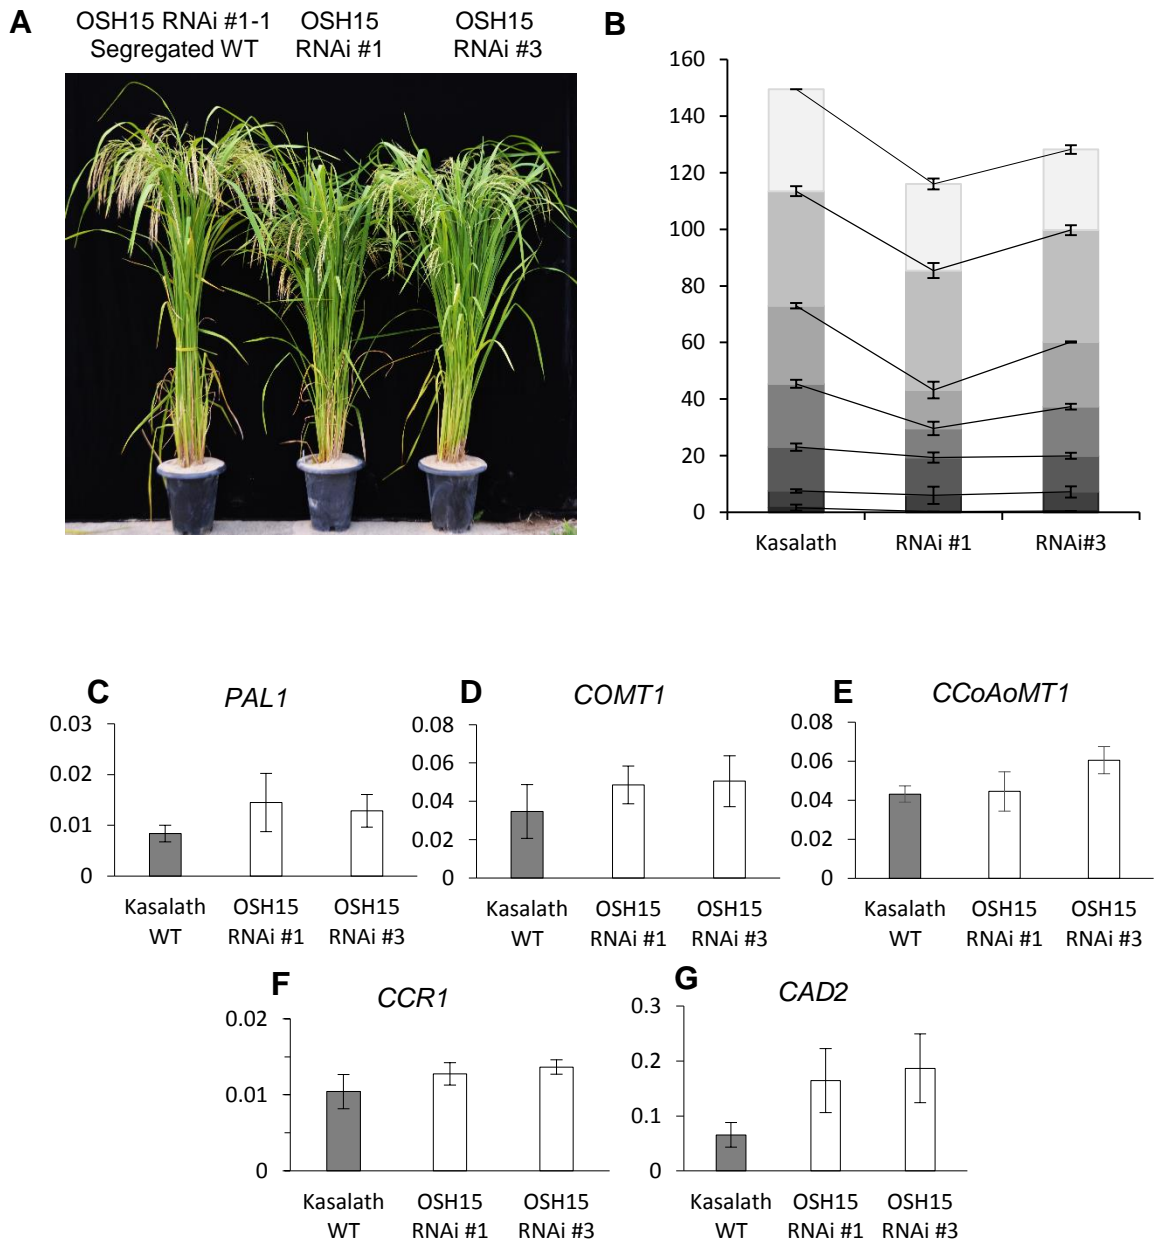

**Supplemental Figure 4.** Analysis of *OSH15* ‘Kasalath’ RNAi transgenic plants. A, Phenotypic comparisons between WT and transgenics. B, Schematic representation of internode elongation patterns for WT and RNAi plants. n = 5. C to G, Expression patterns for *PAL1*(C), *COMT1* (D), *CCoAoMT1* (E), *CCT1* (F), and *CAD2* (G) in IM before heading stage, when WT internode was approximately 5 cm long. n = 4.

**Supplemental Table 1.** Primers used in this study

| Primer name         | Sequence (5' to 3')              |
|---------------------|----------------------------------|
| OSH15 pro GUS F     | GTAACTCACGACCTCACTGAACTAG        |
| OSH15 pro GUS R     | TCTAGACCTCCTCCTCCAAGATTCC        |
| OSH15 3'UTR RNAi F  | ACCCACAGAATGCTGCTGCA             |
| OSH15 3'UTR RNAi R  | GGGGTACCAACATTACTGGAGAACTATAAGCC |
| OSH15 real time F   | GAGAGAGAGCCTAGCTGCTA             |
| OSH15 real time R   | CGTGACCGTGGTACTGCGA              |
| OSH15 RNA in situ F | ACCCACAGAATGCTGCTGCA             |
| OSH15 RNA in situ R | AACATTACTGGAGAACTATAAGCC         |
| OSH15 FL_F          | GTTAAC GAGAGAGAGCCTAGCTG         |
| OSH15 FL_R          | GGTACCCGAACCGAGGCGGTACATTC       |
| SH5 FL F            | GTTAACATGTCGTCCGCCGCGGGGGGA      |
| SH5 FL R            | GGTACCACCAACAAAGTCATGGAGC        |
| qSH1 FL F           | GTTAACATGTCGTCCGCCGCTGGGGG       |
| qSH1 FL R           | GGTACCCCGACAAAATCATGCAGCA        |
| 1D-03912 L          | TCACCCATGCATATCAACAG             |
| 1D-03912 RS         | CCTCCTCCAAGATTCCCAA              |
| OsCOMT1 F           | CCTCGCCCTCATGAACCA               |
| OsCOMT1 R           | CGTCCAGGACTGCGTCCTTA             |
| CAD2 F              | GCGAGTGCCATCCGTGCAA              |
| CAD2 R              | GAGCTGATCACCGTCACGT              |
| CCoAoMT1 F          | AACCTGCTGCTGAAGCTCATC            |
| CCoAoMT1 R          | GGTGGCGAGGAGGGAGTAG              |
| CCR1 F              | CTCATCCGTGGCTACCACGTC            |
| CCR1 R              | GGGTAGGACTTCTTGGTGCC             |
| PAL1 F              | AGGAGCTCGGCTGCGTATT              |
| PAL1 R              | ATGCCGAGGAACACCTTGTT             |
| Ubi_real_Ko_F       | AACCAGCTGAGGCCCAAGA              |
| Ubi_real_Ko_R       | ACGATTGATTTAACCAGTCCATGA         |

**Supplemental Table 2.** Primers used in ChIP assay

| Primer name  | Sequence (5' to 3')      |
|--------------|--------------------------|
| CAD2 ChIP_F1 | ACCCTATGGTAACAAGGTTATG   |
| CAD2 ChIP_R1 | TCCATAACCCTAACAGATTCCC   |
| CAD2 ChIP_F2 | GGGAATCTGTTAGGGTTATGGA   |
| CAD2 ChIP_R2 | TATACCCATAGGTGTCCCCTTG   |
| CAD2 ChIP_F3 | GGTTGTAGGGCTATTACCTGAC   |
| CAD2 ChIP_R3 | CTCGGTTATTACGTTCACTATCC  |
| CAD2 ChIP_F4 | GGATAGTGAACGTAATAACCGAG  |
| CAD2 ChIP_R4 | CTATTCAACTACTTTATCCGTATC |
| CAD2 ChIP_F5 | GATACGGATAAAGTAGTTGAATAG |
| CAD2 ChIP_R5 | GTTAGTAGTAGGACAAGTAGTG   |
| CAD2 ChIP_F6 | CTCAGTCACGACCCGTCCAAC    |
| CAD2 ChIP_R6 | CCAATGGATGGATCGGATTC     |
| CAD2 ChIP_F7 | CAACTACACCCTCAGGTATGAT   |
| CAD2 ChIP_R7 | AGTTGTACTCGAGGCAGATG     |
| CAD2 ChIP_F8 | CTCCATTGATCCATTCCAC      |
| CAD2 ChIP_R8 | TGTGGAGCCAGGCAACTAGC     |
| CAD2 ChIP_F9 | TGTGTGAGACTCTGACGACTTGTC |
| CAD2 ChIP_R9 | CATATATTGCGAGGCCGAATTT   |
| Ehd1 ChIP_F1 | CGTCATGATCATATCAACGG     |
| Ehd1 ChIP_R1 | GTAATACTATATACGACAGG     |
| Ehd1 ChIP_F2 | CTGTGTCTACCTTGCACTAC     |
| Ehd1 ChIP_R2 | TGCATGATGCATGGAATGCG     |
| Ehd1 ChIP_F3 | TCATTA ACTATATATGGTGAC   |
| Ehd1 ChIP_R3 | ATTATTATAACCTAATTAGGAG   |
| Ehd1 ChIP_F4 | ACTACACACGTGTCCATGCA     |
| Ehd1 ChIP_R4 | ACTGACTGAACTTAAATAGTAG   |
| Ehd1 ChIP_F5 | AAAGATGATCAGCTCTGTGG     |
| Ehd1 ChIP_R5 | TACCCTCCAAGACTTCGATT     |
